# Supplementary material for: Evaluation of Subjective Appetite Assessment under Free-Living vs. Controlled Conditions: A Randomized Crossover Trial Comparing Whole-Grain Rye and Refined Wheat Diets (VASA-Home)
Source: MDPI journal article supplement (doi:10.3390/nu15112456), 2023-05-25
Supplement: s1 [file s1]

## **Supplementary Materials:**

# **Evaluation of Subjective Appetite Assessment under Free-Living vs. Controlled Conditions: A Randomized Crossover Trial Comparing Whole-Grain Rye and Refined Wheat Diets (VASA-Home)**

### **Supplementary Text S1. Continuous glucose monitors and physical activity.**

Interstitial blood glucose was measured during all five intervention days through continuous glucose monitors (CGM). The CGM (Abbott Freestyle Libre Pro IQ) sensor was applied at the back of the upper part of the non-dominant arm at the clinic and removed after interventions at the clinic by study personal. Participants were instructed to avoid hot tubes, sauna or other conditions exposing the sensor for high temperature. The sensor is waterproof, hence no restrictions to sanitation or recreational activities were needed. Participants were blinded to glucose data. Physical activity was monitored throughout intervention days using pedometer (Yamax Digiwalker SW-700/701, Yamax, Japan). Participants were instructed to attach the pedometer to the waistband at the hip in the morning 8.00 AM and the step count was registered at the end of each intervention day, at 9.00 PM. Participants were instructed not to look at their step count during intervention days, to avoid behavioral changes.

### **Supplementary Text S2. Blood sampling and baseline fecal samples.**

At the 5<sup>th</sup> intervention day, participants consumed either wheat or rye-based diets at the clinic and venous blood samples were drawn into a 6 ml EDTA tube and a 4 ml sodium heparin tube by a trained research nurse. Blood samples were collected 10 minutes prior to meals and 15, 35, 65, 95, 125, 155, 185 and 230 minutes after meals, a total of 27 timepoints throughout the intervention day, see supplementary materials (Table 7). An inhibitor cocktail was added to the EDTA tubes to prevent hormone degradation. The inhibitor cocktail was prepared daily by dissolving 1 SIGMAFAST™ Protease Inhibitor tablet (catalogue no. S8820; Sigma-Aldrich Co) in 2.2 ml deionized water containing 5.5 µl 10 mM-dipeptidyl peptidase-IV inhibitor KR-62436 (catalogue no. K4264; Sigma-Aldrich) and dimethyl sulfoxide (Sigma-Aldrich, St. Louis, MO, US). The EDTA and heparin tubes were kept on ice before and after sampling and centrifuged at 4 °C and 2500g for 10min. The blood plasma was transferred to cryotubes and placed in -20 °C for a maximum of 7 days before being transferred to -80 °C for long term storage. Buffy coat and erythrocyte samples were extracted from a fasted EDTA sample (time 0) stored in -20 °C for up to 7 days, before transferred to -80 °C for long term storage.

Baseline fecal samples were collected with EasySampler® fecal collection kit and stored for later analysis. Participants collected the sample within 24 hours of their visit at the clinic and keep it in a cooling bag, with frozen cooling blocks from sampling to delivery at the clinic. Fecal samples that had been stored in household freezer >-18°C were accepted if delivered to the research clinic within 72 hours of sampling. All samples were kept in -20°C freezer for no more than 7 days, and then transferred to -80°C freezer for long term storage.

**Supplementary Table S1.** Satiety scores measured as 100mm VAS.

| Measure: mm-VAS       |            |             |                    |        |
|-----------------------|------------|-------------|--------------------|--------|
| A)                    | Clinic     | Free-living | P value difference | Effect |
| Fullness (30–780min)  | 60.4       | 57.7        | 0.095              | 4,7%   |
| Fullness (30–240min)  | 63.5       | 60.7        | 0.058              | 4.6%   |
| Fullness (300–420min) | 70         | 65.6        | 0.026              | 6.7%   |
| Fullness (480–660min) | 43.3 ± 2.2 | 38.3 ± 2.4  | 0.04*              | 13.1%  |
| Fullness (720–780min) | 81.5       | 77.9        | 0.069              | 4.6%   |
| Desire (30–780min)    | 34.9       | 36          | 0.525              | 3.2%   |
| Desire (30–240min)    | 32.2       | 32.1        | 0.96               | -0.3%  |
| Desire (300–420min)   | 27.5       | 29.4        | 0.44               | 6.9%   |
| Desire (480–660min)   | 51.3       | 56.2        | 0.059              | 9.6%   |
| Desire (720–780min)   | 14.9       | 18.3        | 0.207              | 22.8%  |
| Hunger (30–780min)    | 33.4       | 34.4        | 0.574              | 3.0%   |
| Hunger (30–240min)    | 30.8       | 30.7        | 0.94               | -0.3%  |
| Hunger (300–420min)   | 24.4       | 27.9        | 0.095              | 14.3%  |
| Hunger (480–660min)   | 49.8       | 54.5        | 0.07               | 9.4%   |
| Hunger (720–780min)   | 11.9       | 12.6        | 0.756              | 5.9%   |
| B)                    | Rye        | Wheat       |                    |        |
| Fullness (30–780min)  | 59.6       | 58.5        | 0.43               | 1,9%   |
| Fullness (30–240min)  | 62,2       | 60          | 0,86               | 3,7%   |
| Fullness (300–420min) | 69,1       | 66,5        | 0,13               | 3,9%   |
| Fullness (480–660min) | 41,4       | 40,2        | 0,566              | 3,0%   |
| Fullness (720–780min) | 81.6 ± 1.9 | 77.8 ± 1.9  | 0.03*              | 4.9%   |
| Desire (30–780min)    | 34.3       | 36.6        | 0.1                | 6,7%   |
| Desire (30–240min)    | 31,9       | 32,4        | 0,71               | 1,6%   |
| Desire (300–420min)   | 24.1 ± 1.8 | 30.2 ± 1.4  | 0.04*              | 20.2%  |
| Desire (480–660min)   | 51.5 ± 2.2 | 56 ± 2.2    | 0.04*              | 8.0%   |
| Desire (720–780min)   | 16,5       | 16,7        | 0,942              | 1,2%   |
| Hunger (30–780min)    | 32.9       | 34.1        | 0.41               | 3,6%   |
| Hunger (30–240min)    | 31,2       | 30,2        | 0,45               | -3,2%  |
| Hunger (300–420min)   | 22.8 ± 1.7 | 26.7 ± 1.7  | 0.05*              | 14.6%  |
| Hunger (480–660min)   | 51,1       | 53,1        | 0,362              | 3,9%   |
| Hunger (720–780min)   | 10,7       | 13,8        | 0,0759             | 29,0%  |

All values are least-square means.

\*For significant contrasts least-square means ± SEM are presented.

**Supplementary Table S2.** Satiety scores measured as tAUC.

| Measure: tAUC         |              |              |                    |        |
|-----------------------|--------------|--------------|--------------------|--------|
| A)                    | Clinic       | Free-living  | P value difference | Effect |
| Fullness (30–780min)  | 44616 ± 1320 | 41653 ± 1381 | 0.008*             | 7.1%   |
| Fullness (30–240min)  | 14743        | 14344        | 0,334              | 2,8%   |
| Fullness (240–420min) | 10853 ± 522  | 9598 ± 476   | 0.03*              | 13.1%  |
| Fullness (420–660min) | 10853 ± 522  | 9598 ± 476   | 0.03*              | 13.1%  |
| Fullness (660–780min) | 7631         | 7132         | 0,197              | 7,0%   |
| Desire (30–780min)    | 29721        | 31234        | 0,197              | -4,8%  |
| Desire (30–240min)    | 8077         | 7894         | 0,679              | 2,3%   |
| Desire (240–420min)   | 6032         | 6621         | 0,178              | -8,9%  |
| Desire (420–660min)   | 11919        | 12947        | 0,109              | -7,9%  |
| Desire (660–780min)   | 3667         | 4218         | 0,103              | -13,1% |
| Hunger (30–780min)    | 28322        | 29922        | 0,187              | -5,3%  |
| Hunger (30–240min)    | 7753         | 7421         | 0,419              | 4,5%   |
| Hunger (240–420min)   | 5570         | 5980         | 0,346              | -6,9%  |
| Hunger (420–660min)   | 11541 ± 424  | 12848 ± 487  | 0,049*             | -10,2% |
| Hunger (660–780min)   | 3404         | 3602         | 0,491              | -5,5%  |
| B)                    | Rye          | Wheat        |                    |        |
| Fullness (30–780min)  | 43708        | 42561        | 0,241              | 2,7%   |
| Fullness (30–240min)  | 14483        | 14604        | 0,74               | -0,8%  |
| Fullness (240–420min) | 11062        | 11011        | 0,893              | 0,5%   |
| Fullness (420–660min) | 10428        | 10023        | 0,436              | 4,0%   |
| Fullness (660–780min) | 7810 ± 227   | 6953 ± 230   | 0,0159*            | 12,3%  |
| Desire (30–780min)    | 29620        | 31336        | 0,104              | -5,5%  |
| Desire (30–240min)    | 8030         | 7941         | 0,82               | 1,1%   |
| Desire (240–420min)   | 6037         | 6616         | 0,146              | -8,8%  |
| Desire (420–660min)   | 11969        | 12898        | 0,108              | -7,2%  |
| Desire (660–780min)   | 3862         | 4023         | 0,594              | -4,0%  |
| Hunger (30–780min)    | 28687        | 29557        | 0,422              | -2,9%  |
| Hunger (30–240min)    | 7764         | 7411         | 0,334              | 4,8%   |
| Hunger (240–420min)   | 5584         | 5966         | 0,333              | -6,4%  |
| Hunger (420–660min)   | 12045        | 12345        | 0,611              | -2,4%  |
| Hunger (660–780min)   | 3188 ± 159   | 3817 ± 160   | 0,0176*            | -16,5% |

All values are least-square means.

\*For significant contrasts least-square means ± SEM are presented.

**Supplementary Table S3.** Nutritional composition of rye and wheat intervention foods.

| (A)                  | Product weight (g) | Energy (kcal) | CHO (g) | Protein (g) | Fat (g) | Dietary fiber (g) <sup>†</sup> |       |         |
|----------------------|--------------------|---------------|---------|-------------|---------|--------------------------------|-------|---------|
|                      |                    |               |         |             |         | Total                          | Extr. | Unextr. |
| Extruded rye puffs   | 100.0              | 345.4         | 64.4    | 8.6         | 1.5     | 16.8                           | 6.9   | 9.9     |
| Rye crispbread       | 100.0              | 330.1         | 59.5    | 9.8         | 1.6     | 17.0                           | 6.7   | 10.3    |
| Soft rye bread       | 100.0              | 218.8         | 35.8    | 5.9         | 3.1     | 10.6                           | 3.8   | 6.9     |
| Extruded wheat puffs | 100.0              | 369.2         | 73.0    | 12.4        | 1.3     | 5.4                            | 2.5   | 2.9     |
| Wheat crispbread     | 100.0              | 382.9         | 64.5    | 12.2        | 6.7     | 5.6                            | 1.5   | 4.0     |
| Soft wheat bread     | 100.0              | 266.9         | 48.8    | 9.9         | 2.4     | 3.53                           | 1.03  | 2.5     |

  

| (B)                  | Product weight (g) | Energy (kcal) | CHO (g) | Protein (g) | Fat (g) | Dietary fiber (g) <sup>†</sup> |       |         |
|----------------------|--------------------|---------------|---------|-------------|---------|--------------------------------|-------|---------|
|                      |                    |               |         |             |         | Total                          | Extr. | Unextr. |
| Extruded rye puffs   | 60                 | 207.3         | 38.7    | 5.2         | 0.9     | 10.1                           | 4.1   | 6.0     |
| Rye crispbread       | 54                 | 178.3         | 32.1    | 5.3         | 0.9     | 9.2                            | 3.6   | 5.6     |
| Soft rye bread       | 117                | 255.9         | 41.9    | 6.9         | 3.6     | 12.4                           | 4.4   | 8.0     |
| Extruded wheat puffs | 60                 | 207.4         | 43.8    | 7.4         | 0.8     | 3.3                            | 1.5   | 1.7     |
| Wheat crispbread     | 66                 | 252.7         | 42.6    | 8.1         | 4.4     | 3.7                            | 1.0   | 2.7     |
| Soft wheat bread     | 72                 | 192.2         | 35.1    | 7.1         | 1.7     | 2.5                            | 0.7   | 1.8     |

(A) Nutritional composition per 100g of product, (B) nutritional composition for products throughout an intervention day.

<sup>†</sup> Dietary fibre is contributing with 2.0 kcal/g as described by FAO/WHO Expert Consultation on Carbohydrates in Human Nutrition 1997.

**Supplementary Table S4.** Overview of blood sampling timepoints and meals.

| Time         | Minutes    | Meal             |
|--------------|------------|------------------|
| 07:50        | -10        |                  |
| <b>08:00</b> | <b>0</b>   | <b>Breakfast</b> |
| 08:15        | 15         |                  |
| 08:35        | 35         |                  |
| 09:05        | 65         |                  |
| 09:35        | 95         |                  |
| 10:05        | 125        |                  |
| 10:35        | 155        |                  |
| 11:05        | 185        |                  |
| 11:50        | 230        |                  |
| <b>12:00</b> | <b>240</b> | <b>Lunch</b>     |
| 12:15        | 255        |                  |
| 12:35        | 275        |                  |
| 13:05        | 305        |                  |
| 13:35        | 335        |                  |
| 14:05        | 365        |                  |
| 14:50        | 410        |                  |
| <b>15:00</b> | <b>420</b> | <b>Snack</b>     |
| 15:15        | 435        |                  |
| 15:35        | 455        |                  |
| 16:05        | 485        |                  |
| 16:35        | 515        |                  |
| 17:05        | 545        |                  |

|              |            |               |
|--------------|------------|---------------|
| 17:35        | 575        |               |
| 18:05        | 605        |               |
| 18:50        | 650        |               |
| <b>19:00</b> | <b>660</b> | <b>Dinner</b> |
| 19:15        | 675        |               |
| 19:35        | 695        |               |
| 20:05        | 725        |               |
| 20:35        | 755        |               |

All timepoints for venous blood sampling and meals throughout intervention day 5 with either rye or wheat-based diets.
